# Supplementary material for: Genome-Wide Determination of Gene Essentiality by Transposon Insertion Sequencing in Yeast Pichia pastoris
Source: PubMed Central journal article supplement (PMC6033949; doi:10.1038/s41598-018-28217-z), 2018-07-05
Supplement: 41598_2018_28217_MOESM2_ESM.pdf [file 41598_2018_28217_MOESM2_ESM.pdf]

**Genome-Wide Determination of Gene Essentiality by Transposon Insertion Sequencing in Yeast *Pichia pastoris***

Jinxiang Zhu<sup>1</sup>, Ruiqing Gong<sup>1</sup>, Qiaoyun Zhu<sup>1</sup>, Qiulin He<sup>1</sup>, Ning Xu<sup>1</sup>, Yichun Xu<sup>1</sup>, Menghao Cai<sup>1</sup>, Xiangshan Zhou<sup>1</sup>, Yuanxing Zhang<sup>1,2</sup> and Mian Zhou<sup>1,\*</sup>

<sup>1</sup> State Key Laboratory of Bioreactor Engineering, East China University of Science and Technology, Shanghai 200237, China

<sup>2</sup> Shanghai Collaborative Innovation Center for Biomanufacturing (SCICB), Shanghai 200237, China

\*Corresponding author: E-mail for Mian Zhou: [mianzhou@ecust.edu.cn](mailto:mianzhou@ecust.edu.cn)

**Table S1. Primers and PCR templates for plasmid construction**

| Primer name       | Primer sequences (5'-3')                   | PCR template                                       | Amplification products | Logogram             |
|-------------------|--------------------------------------------|----------------------------------------------------|------------------------|----------------------|
| THI11p2-amp-F     | AATAACAGTTATTATTCGCAAGTCCGGTACAAGCGTGC     | GS115 genome DNA                                   | PpTHI11p fragment      |                      |
| THI11p-R          | CATGATGATTTATTGAAGTTTCC                    |                                                    |                        |                      |
| PpMET3p-amp-F     | AATAACAGTTATTATTCGTTTCAGGCAACAGGACCCTCC    | GS115 genome DNA                                   | PpMET3p fragment       | Promoter fragment    |
| PpMET3p-R         | TTCTTTCTGAGTTGGTTTC                        |                                                    |                        |                      |
| PpAOX1p-amp-F     | AATAACAGTTATTATTCGCGAGATCTAACATCCAAAGAC    | GS115 genome DNA                                   | PpAOX1p fragment       |                      |
| PpAOX1p-R         | CGTTTCGAATAATTAGTTGT                       |                                                    |                        |                      |
| pG-A1-F           | TAAGTTTTAGCCTTAGACATGAC                    | pPICZalpha B <sup>*</sup>                          | AOX1TT fragment        |                      |
| AOX1TT-A1-R       | GGATCCGCACAAACGAAG                         |                                                    |                        |                      |
| His-starg-F       | ATTCTGCGAGAAGGTCCTGGATGCTGTAGGCATAG        | pPIC3.5K <sup>*</sup>                              | His4 fragment          |                      |
| His-starg-R       | CTTCGTTTGTGCGGATCACACTGGCAGAGCATTACGC      |                                                    |                        |                      |
| Himarase-met3p-F  | CCAACTCAGAAAGAAATGGAAAAAAGGAATTTTCGTG      | pMAR 2XT7 <sup>[1]</sup>                           | Himarase fragment      |                      |
| Himarase-aox1tt-R | TCTAAGGCTAAAACCTTATTC AACATAGTTCCCTTCAAG   |                                                    |                        |                      |
| SBase-met3p-F     | ACCAACTCAGAAAGAAATGGGAAAATCAAAGAAATC       | pCMV(CAT)T7-SB100 <sup>[2]</sup>                   | SBase fragment         |                      |
| SBase-aox1tt-R    | TCTAAGGCTAAAACCTTAGTATTTGGTAGCATTGC        |                                                    |                        |                      |
| Osmarase-met3p-F  | ACCAACTCAGAAAGAAATGCAAGAGTACGGCGTGT        | pOsm14Tpase <sup>[3]</sup>                         | Osmarase fragment      | Transposase fragment |
| Osmarase-aox1tt-R | TCTAAGGCTAAAACCTTACTGCACTTGGTTGGCTAA       |                                                    |                        |                      |
| TcBase-met3p-F    | ACCAACTCAGAAAGAAATGATGCTGAATTGGCTGAAA      | pGALS-TcBusterCOHyper <sup>[4]</sup>               | TcBase fragment        |                      |
| TcBase-aox1tt-R   | TCTAAGGCTAAAACCTTAGTGAGATTTCTGGGCCTGC      |                                                    |                        |                      |
| Mosase-met3p-F    | ACCAACTCAGAAAGAAATGTGCGAGTTTCGTGCCG        | pCFJ601 - Pef1-3 Mos1 transposase <sup>[5]</sup>   | Mosase fragment        |                      |
| Mosase-aox1tt-R   | TCTAAGGCTAAAACCTTATTC AAAGTATTTGCCGTCG     |                                                    |                        |                      |
| HimarL-amp-F      | ATAACAGTTATTATTCGTAACAGGTTGGCTGATAAGTC     | pMAR 2XT7                                          | HimarTIRL fragment     |                      |
| HimarL-arg4-R     | GGACCTTCTCGCAGAATCAAGCAGATTACGGTGACG       |                                                    |                        |                      |
| SBL-amp-F         | ATAACAGTTATTATTCGAATTGGAGCTCGGATCCCTA      | pT2-shp53/GFP4 <sup>[6]</sup>                      | SBTIRL fragment        |                      |
| SBL-arg4-R        | GGACCTTCTCGCAGAATCTATGGCTCGTACTCTATAG      |                                                    |                        |                      |
| OsmarL-amp-F      | ATAACAGTTATTATTCGTGAGGTCGTGTTACTCCCTCCG    | pT7-GFP-oen <sup>[7]</sup>                         | OsmarTIRL fragment     | TIRL fragment        |
| OsmarL-arg4-R     | GGACCTTCTCGCAGAATGTA AACAGAGAAATTTTATTCC   |                                                    |                        |                      |
| TcBL-amp-F        | ATAACAGTTATTATTCGCTTTAGGCCAGTGTCTTCAAC     | pRS416 URA3 mini TcBuster-ClonNAT <sup>[4]</sup>   | TcBTIRL fragment       |                      |
| TcBL-arg4-R       | GGACCTTCTCGCAGAATATTTCTGAACGATTCTAGGTT     |                                                    |                        |                      |
| MosL-amp-F        | ATAACAGTTATTATTCGTTTTGGTCATGCATGAGATC      | pJL43.1 - Pglh-2::MosTase::glh-2utr <sup>[5]</sup> | MosTIRL fragment       |                      |
| MosL-arg4-R       | GGACCTTCTCGCAGAATTAGCTTGGCGTAATCATGG       |                                                    |                        |                      |
| HimarR-arg4-F     | GATCCGCACAAACGAAGACCGAGATAGGGTTGAGTG       | pMAR 2XT7                                          | HimarTIRR fragment     |                      |
| HimarR-pbr322-R   | CTGGCCTTTTGCTCACATAACAGGTTGGCTGATAAGTC     |                                                    |                        |                      |
| SBR-arg4-F        | GATCCGCACAAACGAAGAGATCTAGCTTGTGGAAGGC      | pT2-shp53/GFP4                                     | SBTIRR fragment        |                      |
| SBR-pbr322-R      | CTGGCCTTTTGCTCACAGACTCTAGCTAGAGGATCCC      |                                                    |                        |                      |
| OsmarR-arg4-F     | GATCCGCACAAACGAAGGTGCTGAGGGTAGGTAGGAT      | pT7-GFP-oen                                        | OsmarTIRR fragment     | TIRR fragment        |
| OsmarR-pbr322-R   | CTGGCCTTTTGCTCACAAACACTAAACCGTTTACTCC      |                                                    |                        |                      |
| TcBR-arg4-F       | GATCCGCACAAACGAAGTTTTTATTTTTTATTTATATATTAT | pRS416 URA3 mini TcBuster-ClonNAT                  | TcBTIRR fragment       |                      |
| TcBR-pbr322-R     | CTGGCCTTTTGCTCACAGTATAAAGCAGTGTCTTCAACC    |                                                    |                        |                      |

|               |                                              |                                              |                               |
|---------------|----------------------------------------------|----------------------------------------------|-------------------------------|
| MosR-arg4-F   | GATCCGCACAAACGAAGTGCCGGATCTGCGGCTTA          | pJL43.1 - Pglh-2::MosTase::glh-2utr          | MosTIRR fragment              |
| MosR-pbr322-R | CTGGCCTTTTGCTCACAGGATCCAACAAAAAAGCACT        |                                              |                               |
| pG-A1-F       | TAAGTTTTAGCCTTAGACATGAC                      | pPICZalpha B                                 | AOX1TT-Zeocin-pBR322 fragment |
| pBR-ampr2-R   | CGAATAATAACTGTTATTCATGACCAAAATCCCTTAACG      |                                              |                               |
| pG-A2-F       | TGTGAGCAAAAGGCCAGC                           | pPIC3.5K                                     | pBR322-Amp                    |
| Amp-L1-R      | CGAATAATAACTGTTATTTTTTCAGTG                  |                                              |                               |
| pAG32-A1-F    | CAAGGGTCTCGAGATAAGAAGCCAGGTTAACCTGCATTAATG   | pAG32 <sup>[7]</sup>                         | pAG32Linear fragment          |
| pAG32-A1-R    | CAAATCAAAATCAAACCTGATCGAAATAGCTCGTTTTTCGACAC |                                              |                               |
| DAS1TT-R      | CTTATCTCGAGACCCTTGTGACTGACACTT               | pPpT4_pHTX1-HsCas9-GUT1-gRNA2 <sup>[8]</sup> | HXT1-HsCas9 fragment          |
| HTX1-R        | TCAGTTTGATTTTGATTTGTTTAGGTTAACT              |                                              |                               |
| Zeocin-pars-F | GTTGAGTCGACATCGAGGATCCCCACACACCATAG          | pPICZalpha B                                 | pDZ-Zeocin fragment           |
| pDZ-htx1-R    | CACAAGGGTCTCGAGATAGATCTCATGCATGACCAAAATC     |                                              |                               |
| PARS-F        | CTCGAACATAGTCCGTCCC                          | GS115 genome DNA                             | PARS fragment                 |
| PARS-R        | TCGATGTCGACTCAACCTAT                         |                                              |                               |
| HTX1-F        | TCGAGACCCTTGTGTGTTGTAGTTTTAATATAGTT          | pPpT4_pHTX1-HsCas9-GUT1-gRNA2 <sup>[8]</sup> | HXT1-gRNA-AOX1TT fragment     |
| AOX1TT-pars-R | ACGGACTATGTTTCGAGGATCCGCACAAACGAACGTCTCAC    |                                              |                               |

\* Invitrogen

[1] Liberati NT1, et al. (2006) An ordered, nonredundant library of *Pseudomonas aeruginosa* strain PA14 transposon insertion mutants. *Proc Natl Acad Sci U S A* 103(8):2833-8.

[2] Mátés L, et al. (2009) Molecular evolution of a novel hyperactive *Sleeping Beauty* transposase enables robust stable gene transfer in vertebrates. *Nat Genet* 41(6):753-61.

[3] Fattash I, et al. (2013) A rice *Stowaway* MITE for gene transfer in yeast. *PLoS One* 2013, 21: 8(5)

[4] Li X, et al. (2013) A resurrected mammalian *hAT* transposable element and a closely related insect element are highly active in human cell culture. *Proc Natl Acad Sci U S A* 110(6):E478-87.

[5] Frøkjær-Jensen C, et al. (2012) Improved *Mos1* -mediated transgenesis in *C. elegans* . *Nat Methods* 9(2):117-8.

[6] Wiesner SM, et al. (2009) De novo induction of genetically engineered brain tumors in mice using plasmid DNA. *Cancer Res* 69(2):431-9.

[7] Goldstein, A.L, et al. (1999) Three new dominant drug resistance cassettes for gene disruption in *Saccharomyces cerevisiae* . *Yeast* 15, 1541-15.

[8] Weninger A, et al. (2016) Combinatorial optimization of CRISPR/Cas9 expression enables precision genome engineering in the methylotrophic yeast *Pichia pastoris* . *J Biotechnol* 235:139-4

**Table S2. *TcB* and *SB* insertion sites in *P. pastoris***

| Strains           | Chromosome | Chromosome position | Target site duplication | Insertion direct | Insertion gene  |
|-------------------|------------|---------------------|-------------------------|------------------|-----------------|
| <b><i>TcB</i></b> |            |                     |                         |                  |                 |
| 1                 | Chr. I     | 276208              | CCATAGTA                | -                | PAS_chr1-3_0149 |
| 2                 | Chr. II    | 1325749             | ATTTAGAG                | -                |                 |
| 3                 | Chr. IV    | 444217              | ATCTGGGA                | +                |                 |
| 4                 | Chr. I     | 2305281             | GTTTATGT                | -                | PAS_chr1-4_0495 |
| 5                 | Chr. III   | 1510286             | ACCTATGC                | +                | PAS_chr3_0787   |
| 6                 | Chr. III   | 852296              | CACTAGAG                | -                |                 |
| 7                 | Chr. II    | 2004675             | CTATAGAT                | +                |                 |
| 8                 | Chr. II    | 1393275             | GGCTAAAC                | -                | PAS_chr2-1_0738 |
| 9                 | Chr. I     | 1297232             | AGCTAGAC                | -                |                 |
| 10                | Chr. II    | 1260528             | TTTTATGT                | +                |                 |
| 11                | Chr. III   | 1470103             | CTCTAAAA                | -                |                 |
| 12                | Chr. I     | 2781575             | CTCTAGAC                | +                |                 |
| 13                | Chr. I     | 94889               | GTTTAAAA                | -                |                 |
| 14                | Chr. III   | 956286              | GTCTAAAG                | +                | PAS_chr3_0501   |
| 15                | Chr. I     | 1193817             | CTATAAGC                | -                |                 |
| 16                | Chr. IV    | 116970              | CCGTAAAG                | -                |                 |
| 17                | Chr. III   | 654386              | GTTTAAACA               | -                | PAS_chr3_0332   |
| 18                | Chr. II    | 1313009             | ATCTAGTT                | -                | PAS_chr2-1_0878 |
| 19                | Chr. IV    | 962371              | CTTTAATC                | +                | PAS_chr4_0489   |
| 20                | Chr. II    | 1906198             | CTCTATGC                | +                | PAS_chr2-2_0260 |
| <b><i>SB</i></b>  |            |                     |                         |                  |                 |
| 1                 | Chr. II    | 2164550             | TA                      | +                | PAS_chr2-2_0115 |
| 2                 | Chr. I     | 2162578             | TA                      | +                |                 |
| 3                 | Chr. II    | 1892497             | TA                      | -                | PAS_chr2-2_0267 |
| 4                 | Chr. III   | 1517716             | TA                      | -                | PAS_chr3_0792   |
| 5                 | Chr. II    | 325387              | TA                      | +                | PAS_chr2-1_0174 |
| 6                 | Chr. III   | 1071594             | TA                      | +                | PAS_chr3_0561   |
| 7                 | Chr. II    | 420743              | TA                      | -                |                 |
| 8                 | Chr. II    | 589051              | TA                      | -                |                 |
| 9                 | Chr. IV    | 80048               | TA                      | +                |                 |
| 10                | Chr. II    | 55425               | TA                      | +                | PAS_chr2-1_0029 |
| 11                | Chr. III   | 293469              | TA                      | +                |                 |
| 12                | Chr. II    | 370811              | TA                      | -                |                 |
| 13                | Chr. IV    | 290047              | TA                      | +                |                 |
| 14                | Chr. I     | 2212699             | TA                      | -                | PAS_chr1-4_0437 |
| 15                | Chr. I     | 1600842             | TA                      | +                | PAS_chr1-4_0105 |
| 16                | Chr. III   | 1523151             | TA                      | -                | PAS_chr3_0795   |
| 17                | Chr. I     | 2745884             | TA                      | -                |                 |
| 18                | Chr. I     | 1932919             | TA                      | +                | PAS_chr1-4_0666 |
| 19                | Chr. III   | 239054              | TA                      | +                | PAS_chr3_0117   |
| 20                | Chr. I     | 219391              | TA                      | +                | PAS_chr1-3_0114 |

**Table S3. Number of mutants, sequence reads and unique insertion sites for each library**

| <b>Mutant pool</b> | <b>Mutants</b> | <b>Mapped reads</b> | <b>Unique insertion sites</b> |
|--------------------|----------------|---------------------|-------------------------------|
| TcB1               | ~280,000       | 12,480,716          | 66,870                        |
| TcB2               | ~280,000       | 13,875,986          | 64,473                        |
| TcB3               | ~280,000       | 12,911,125          | 62,541                        |
| TcB4               | ~280,000       | 13,025,039          | 63,500                        |
| TcB5               | ~300,000       | 13,303,247          | 68,461                        |
| TcB6               | ~300,000       | 11,433,330          | 69,722                        |
| TcB7               | ~320,000       | 11,710,978          | 71,652                        |
| TcB8               | ~320,000       | 12,886,935          | 76,332                        |
| TcB9               | ~320,000       | 11,733,232          | 72,425                        |
| TcB10              | ~320,000       | 13,252,105          | 78,110                        |
| SB1                | ~100,000       | 19,536,032          | 21,061                        |
| SB2                | ~100,000       | 5,717,466           | 19,544                        |
| SB3                | ~160,000       | 3,410,761           | 35,053                        |
| SB4                | ~160,000       | 7,076,272           | 34,462                        |
| SB5                | ~160,000       | 5,678,536           | 32,931                        |
| SB6                | ~160,000       | 5,078,631           | 35,551                        |
| SB7                | ~160,000       | 5,605,812           | 37,307                        |
| SB8                | ~160,000       | 7,618,087           | 33,556                        |
| SB9                | ~160,000       | 7,081,782           | 31,917                        |
| SB10               | ~160,000       | 8,582,528           | 35,714                        |
| Total              | ~4,480,000     | 201,998,600         | 202,858                       |

Table S4. The proportions of the four nucleotides at target sites.

| Site | Nucleotide | Proportion |      |            | Site | Nucleotide | Proportion  |             |             | Site | Nucleotide | Proportion |      |            |
|------|------------|------------|------|------------|------|------------|-------------|-------------|-------------|------|------------|------------|------|------------|
|      |            | TcB        | SB   | TcB and SB |      |            | TcB         | SB          | TcB and SB  |      |            | TcB        | SB   | TcB and SB |
| 1    | A          | 0.21       | 0.29 | 0.25       | 7    | A          | 0.21        | 0.21        | 0.22        | 13   | A          | 0.21       | 0.22 | 0.22       |
| 1    | T          | 0.33       | 0.31 | 0.32       | 7    | T          | 0.43        | 0.36        | 0.39        | 13   | T          | 0.25       | 0.64 | 0.44       |
| 1    | G          | 0.21       | 0.21 | 0.21       | 7    | G          | 0.13        | 0.21        | 0.18        | 13   | G          | 0.3        | 0.05 | 0.18       |
| 1    | C          | 0.25       | 0.19 | 0.22       | 7    | C          | 0.22        | 0.21        | 0.22        | 13   | C          | 0.24       | 0.09 | 0.17       |
| 2    | A          | 0.31       | 0.29 | 0.3        | 8    | A          | 0.19        | 0.44        | 0.31        | 14   | A          | 0.26       | 0.27 | 0.27       |
| 2    | T          | 0.24       | 0.31 | 0.28       | 8    | T          | 0.3         | 0.18        | 0.24        | 14   | T          | 0.25       | 0.29 | 0.27       |
| 2    | G          | 0.26       | 0.21 | 0.23       | 8    | G          | 0.13        | 0.21        | 0.17        | 14   | G          | 0.26       | 0.2  | 0.23       |
| 2    | C          | 0.19       | 0.2  | 0.19       | 8    | C          | 0.38        | 0.17        | 0.28        | 14   | C          | 0.23       | 0.24 | 0.24       |
| 3    | A          | 0.48       | 0.29 | 0.38       | 9    | A          | 0.02        | 0.01        | 0.01        | 15   | A          | 0.59       | 0.26 | 0.42       |
| 3    | T          | 0.37       | 0.3  | 0.33       | 9    | T          | <b>0.94</b> | <b>0.97</b> | <b>0.95</b> | 15   | T          | 0.19       | 0.31 | 0.25       |
| 3    | G          | 0.1        | 0.21 | 0.16       | 9    | G          | 0.01        | 0.01        | 0.01        | 15   | G          | 0.15       | 0.19 | 0.17       |
| 3    | C          | 0.05       | 0.21 | 0.13       | 9    | C          | 0.04        | 0.01        | 0.03        | 15   | C          | 0.07       | 0.24 | 0.16       |
| 4    | A          | 0.19       | 0.31 | 0.25       | 10   | A          | <b>0.94</b> | <b>0.97</b> | <b>0.95</b> | 16   | A          | 0.37       | 0.3  | 0.33       |
| 4    | T          | 0.6        | 0.26 | 0.42       | 10   | T          | 0.02        | 0.01        | 0.02        | 16   | T          | 0.48       | 0.29 | 0.38       |
| 4    | G          | 0.07       | 0.24 | 0.16       | 10   | G          | 0.04        | 0.01        | 0.02        | 16   | G          | 0.05       | 0.2  | 0.13       |
| 4    | C          | 0.15       | 0.19 | 0.17       | 10   | C          | 0.01        | 0.01        | 0.01        | 16   | C          | 0.1        | 0.21 | 0.16       |
| 5    | A          | 0.25       | 0.29 | 0.27       | 11   | A          | 0.3         | 0.18        | 0.24        | 17   | A          | 0.24       | 0.3  | 0.27       |
| 5    | T          | 0.26       | 0.26 | 0.26       | 11   | T          | 0.18        | 0.44        | 0.31        | 17   | T          | 0.31       | 0.29 | 0.3        |
| 5    | G          | 0.23       | 0.24 | 0.24       | 11   | G          | 0.39        | 0.17        | 0.28        | 17   | G          | 0.19       | 0.2  | 0.2        |
| 5    | C          | 0.26       | 0.2  | 0.23       | 11   | C          | 0.13        | 0.2         | 0.17        | 17   | C          | 0.26       | 0.21 | 0.23       |
| 6    | A          | 0.25       | 0.63 | 0.43       | 12   | A          | 0.43        | 0.35        | 0.39        | 18   | A          | 0.33       | 0.31 | 0.32       |
| 6    | T          | 0.21       | 0.22 | 0.22       | 12   | T          | 0.21        | 0.21        | 0.22        | 18   | T          | 0.2        | 0.29 | 0.25       |
| 6    | G          | 0.24       | 0.09 | 0.17       | 12   | G          | 0.22        | 0.22        | 0.22        | 18   | G          | 0.26       | 0.19 | 0.22       |
| 6    | C          | 0.3        | 0.06 | 0.18       | 12   | C          | 0.13        | 0.22        | 0.18        | 18   | C          | 0.21       | 0.21 | 0.21       |

**Table S5. Mutations in genes disrupted by CRISPR/Cas9 system**

| Locus tag                             | P-value     | Category      | Target site           | Mutation                        |
|---------------------------------------|-------------|---------------|-----------------------|---------------------------------|
| <b>Essential genes validation</b>     |             |               |                       |                                 |
| PAS_chr2-1_0631                       | 0.025990991 | Essential     | AAAGTATCCTGTGTTGACCC  | TTG-, GTT-, TTG-                |
| PAS_chr3_1050                         | 0.026048858 | Essential     | ATGTGACACTCCATCAAACG  | CAT-, ATC-, AAA-                |
| PAS_chr2-1_0167                       | 0.026341799 | Essential     | ATGCTTCGACGACTCAGATG  | GACTCA-, CTC-, CAG-             |
| PAS_chr2-1_0456                       | 0.026353444 | Essential     | CCCGTCTCTTCAGCACTACT  | ACT-, CAC-, CAGCAC-             |
| PAS_chr3_0878                         | 0.026614121 | Essential     | CAACATGAGCAGAAATAACC  | TAA-, ATA-, ATA-                |
| PAS_chr1-1_0191                       | 0.026701837 | Essential     | AAGCCACCAGTTCAATTGTT  | TTG-, GTT-, ATT-                |
| PAS_chr3_0997                         | 0.026911281 | Essential     | TGCTTCATATGTCCTTTACC  | AGA-, AGAAAT-, AAA-             |
| PAS_chr2-1_0366                       | 0.027065392 | Essential     | AGTCCGAAATTGATGACTGG  | GAT-, GAC-, GAT-                |
| PAS_chr2-2_0235                       | 0.02719965  | Essential     | GTTGACCACAGCTAGAATCA  | GAA-, AGA-, AGA-                |
| PAS_chr1-4_0209                       | 0.027343841 | Essential     | GCCGATATTCCATAACAAGAT | CAT-, ACA-, CAT-                |
| PAS_chr2-1_0349                       | 0.027536422 | Essential     | GGATACCACACCTTAAACAA  | AAC-, TTA-, TTA-                |
| PAS_chr1-4_0063                       | 0.027565798 | Essential     | TGAGAGGTACCTTGGAAAGGT | AAG-, TGGAAG-, GAA-             |
| PAS_chr4_0863                         | 0.028177922 | Essential     | TGGGACTGTGTGGTTGCACA  | TGT-, TTG-, TTG-                |
| PAS_chr1-3_0108                       | 0.028277332 | Essential     | AATCAGCAGGAGAGAACGTT  | GAG-, AAC-, GAACGT-             |
| PAS_chr1-3_0186                       | 0.028889788 | Essential     | ATGACCTCAACACATACATG  | A+, AC-                         |
| PAS_chr3_0515                         | 0.028939966 | Essential     | GACCAACCCTAAAACGATAC  | ACG-, CCT-, ACG-                |
| PAS_chr4_0865                         | 0.029052361 | Essential     | GGAAATACCTCAAGTGCAGT  | AGT-, GCA-, GCA-                |
| PAS_chr2-1_0160                       | 0.029233804 | Essential     | GTCTTAGGTTTCCCACGTAT  | C+, ACGT-                       |
| PAS_chr4_0956                         | 0.02934039  | Essential     | GGTATGGTGCCAACATGAAG  | TATGGTGCCAACATG-, AAA-, CATGAA- |
| <b>Non-essential genes validation</b> |             |               |                       |                                 |
| PAS_chr2-2_0180                       | 0.915960201 | Non-essential | TACTTGCTGAACAAATCGGG  | G+                              |
| PAS_chr3_1036                         | 0.920069135 | Non-essential | AGGCAACATTAGTGCCGATC  | CG-                             |
| PAS_chr1-4_0272                       | 0.957357059 | Non-essential | GCTTCGTGCTTCAGTGTGCA  | GT-                             |
| PAS_chr4_0212                         | 0.958519434 | Non-essential | AGAATTATAGGAGTTGGGTC  | G-                              |
| PAS_chr3_0584                         | 0.96877591  | Non-essential | AATTACCGCCTTAGCCGCAT  | C-                              |
| PAS_chr1-1_0055                       | 0.977529915 | Non-essential | GTAATCTATTTATGAGCACC  | GC-                             |
| PAS_chr1-1_0319                       | 0.979367754 | Non-essential | TGTAACGTCCCTTCTACAG   | T-                              |
| PAS_chr1-3_0142                       | 0.981789539 | Non-essential | CGCTAAAGGTGAACCGATTC  | A+                              |
| PAS_chr1-4_0228                       | 0.982379027 | Non-essential | TCTTGTTAACCGTCCAAAAG  | A-                              |
| PAS_chr3_0423                         | 0.985371015 | Non-essential | TCATGTTGCTACTGCTCGCG  | A+                              |
| PAS_chr1-3_0113                       | 0.998142015 | Non-essential | GTTGTAGGTGACGGTGCTGT  | C-                              |
| PAS_chr4_0880                         | 0.998486286 | Non-essential | TTTGATCCGTTCCCGGATAC  | G-                              |
| PAS_chr2-2_0005                       | 0.998842022 | Non-essential | ATTCATCACACTTCATCGCA  | A+                              |
| PAS_chr4_0881                         | 0.999955709 | Non-essential | GCTTCTGAAGAACCAAGAAA  | A-                              |
| PAS_chr2-2_0365                       | 0.999997504 | Non-essential | CTCCGAAGATATAGAGGGTC  | G-                              |
| PAS_chr2-2_0435                       | 0.999997567 | Non-essential | AGAGCAGATAGAGAAACTGC  | T-                              |
| PAS_chr4_0259                         | 0.999999663 | Non-essential | TCCTACTGCAAAGTACAGCG  | AGCG-                           |
| PAS_chr3_0693                         | 0.999999999 | Non-essential | TTCGTCACGGCCAATCTCAA  | CT-                             |

**Table S6. Novel methylotrophic functional genes**

| <b>Locus tag</b> | <b>P-value of YND</b> | <b>P-value of YNM</b> | <b>Target site</b>   | <b>Mutation</b> |
|------------------|-----------------------|-----------------------|----------------------|-----------------|
| PAS_chr3_0072    | 0.958218261           | 0.01215503            | ORF                  | deletion        |
| PAS_chr1-4_0498  | 0.980592211           | 0.237770405           | ORF                  | deletion        |
| PAS_chr1-3_0278  | 0.982058797           | 0.01215503            | CACTGGAGCTTATCTCAACA | ATCTC-          |
| PAS_chr2-1_0748  | 0.990982561           | 0.028365249           | ATGAGCAAACAAACTCCGTC | TC-             |
| PAS_chr3_0968    | 0.945948673           | 0.10067283            | CAAGGCAACCCTGTCTCTGC | T+              |
| PAS_chr3_0689    | 0.971505746           | 0.321835936           | ACGAACTCTCACAGACATAA | C-              |
| PAS_chr2-2_0202  | 0.948634657           | 0.426929721           | AATGAGTAGTTGGATTCCTC | C-              |
| PAS_chr4_0887    | 0.921405674           | 0.478682398           | ATTACTACAAAAGGGGCGAA | A+              |
