# Supplementary material for: Genome-Wide Determination of Gene Essentiality by Transposon Insertion Sequencing in Yeast Pichia pastoris
Source: Sci Rep. 2018 Jul 5;8:10223. doi: 10.1038/s41598-018-28217-z (PMC6033949; doi:10.1038/s41598-018-28217-z)
Supplement: Supplementary file 1 — Figure S1-S6 [file 41598_2018_28217_MOESM1_ESM.pdf]

**Genome-Wide Determination of Gene Essentiality by Transposon Insertion  
Sequencing in Yeast *Pichia pastoris***

Jinxiang Zhu<sup>1</sup>, Ruiqing Gong<sup>1</sup>, Qiaoyun Zhu<sup>1</sup>, Qiulin He<sup>1</sup>, Ning Xu<sup>1</sup>, Yichun Xu<sup>1</sup>,  
Menghao Cai<sup>1</sup>, Xiangshan Zhou<sup>1</sup>, Yuanxing Zhang<sup>1,2</sup> and Mian Zhou<sup>1,\*</sup>

<sup>1</sup> State Key Laboratory of Bioreactor Engineering, East China University of Science  
and Technology, Shanghai 200237, China

<sup>2</sup> Shanghai Collaborative Innovation Center for Biomanufacturing (SCICB), Shanghai  
200237, China

\*Corresponding author: E-mail for Mian Zhou: [mianzhou@ecust.edu.cn](mailto:mianzhou@ecust.edu.cn)

Figure S1

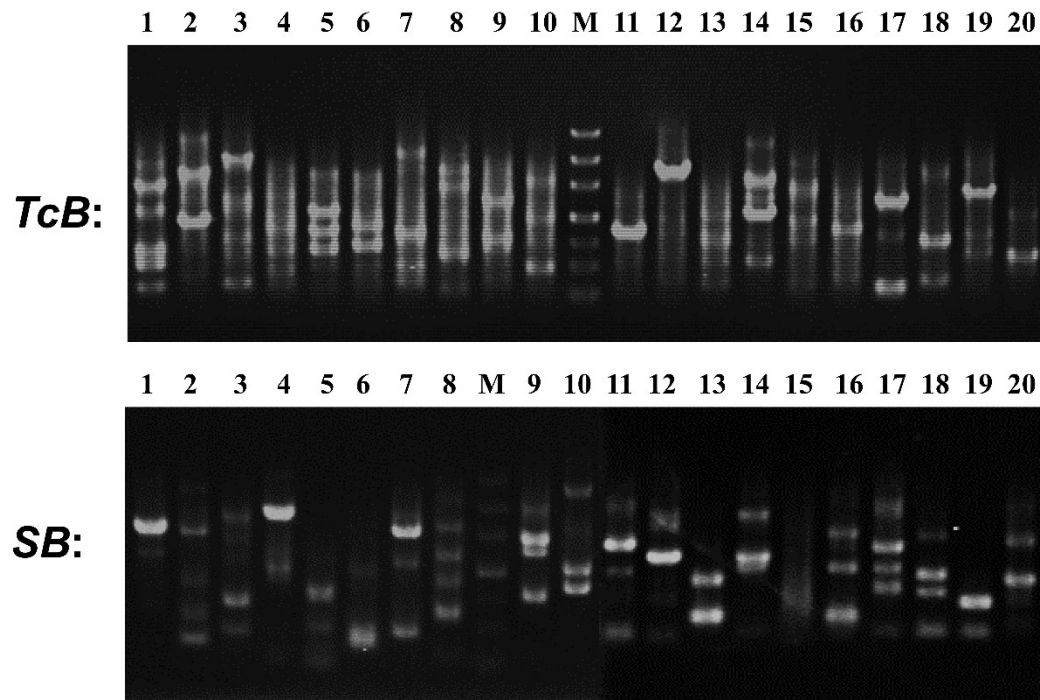

**Figure S1. High-efficiency thermal asymmetric interlaced PCR (hiTAIL-PCR) analysis of His<sup>+</sup> transformants. (A) Amplification of TcBTIRsHis flanking sequences from host genome by hiTAIL-PCR. (B) Amplification of SBTIRsHis flanking sequences from host genome by hiTAIL-PCR.**

Figure S2

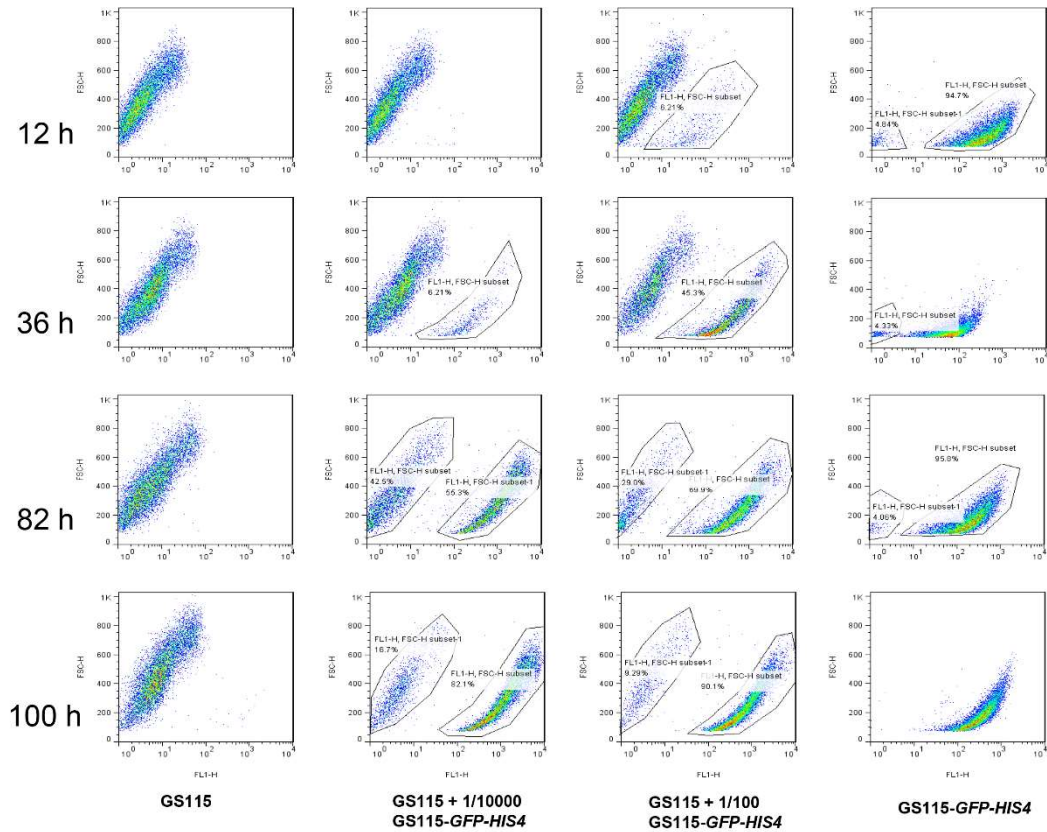

**Figure S2.** Flow cytometric analysis of the ratio of GS115 and GS115-GFP-HIS4 cells at different time points.

Figure S3

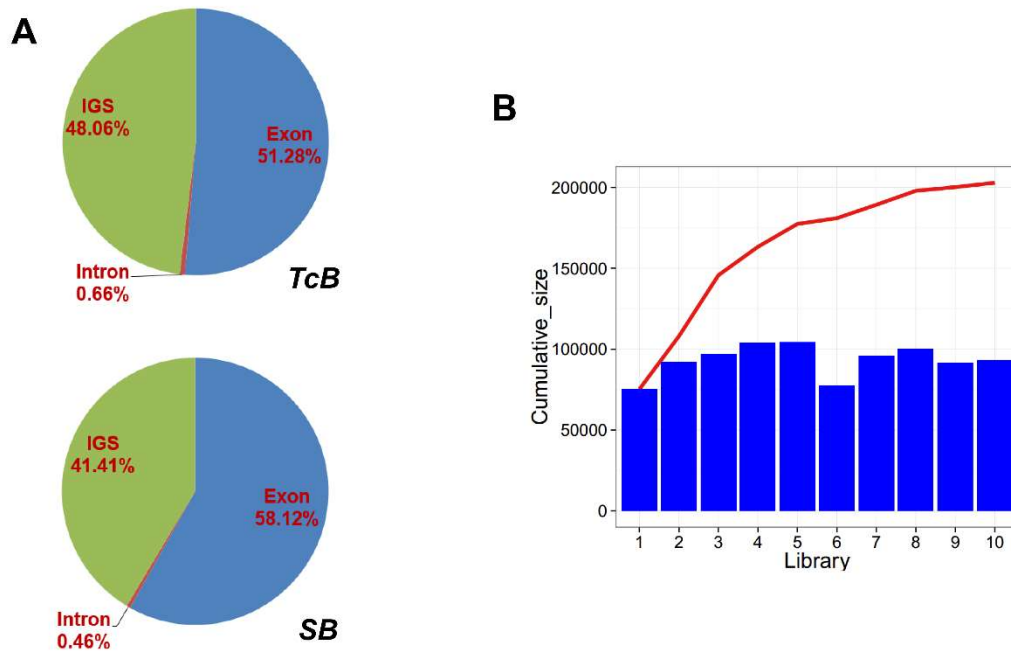

**Figure S3.** (A) Distributions of *TcB* (top panel) and *SB* (bottom panel) insertions in intergenic regions, exons and introns of *P. pastoris*. (B) Saturation analysis of our Tn-seq data sets. The blue bars show the saturation level of the individual subsets. Cumulative saturation levels of insertions are represented by the red line.

Figure S4

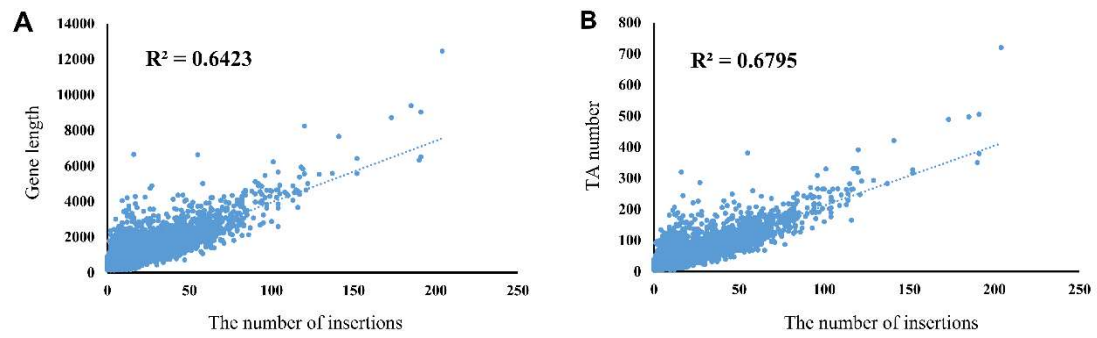

**Figure S4.** (A) The overall correlation between insertions per gene and gene length. (B) The overall correlation between insertions per gene and TA number.

Figure S5

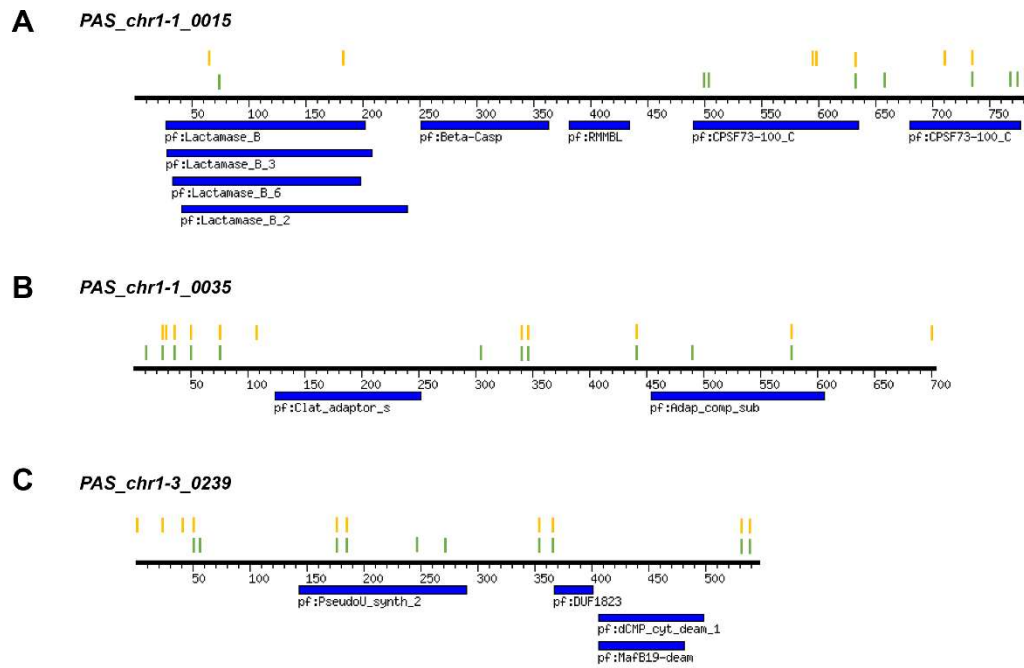

**Figure S5.** The transposon insertion map and domain positions of *PAS\_chr1-1\_0015* (A), *PAS\_chr1-1\_0035* (B) and *PAS\_chr1-3\_0239* (C). Motifs were predicted by SSDB motif search tool on KEGG website.

Figure S6

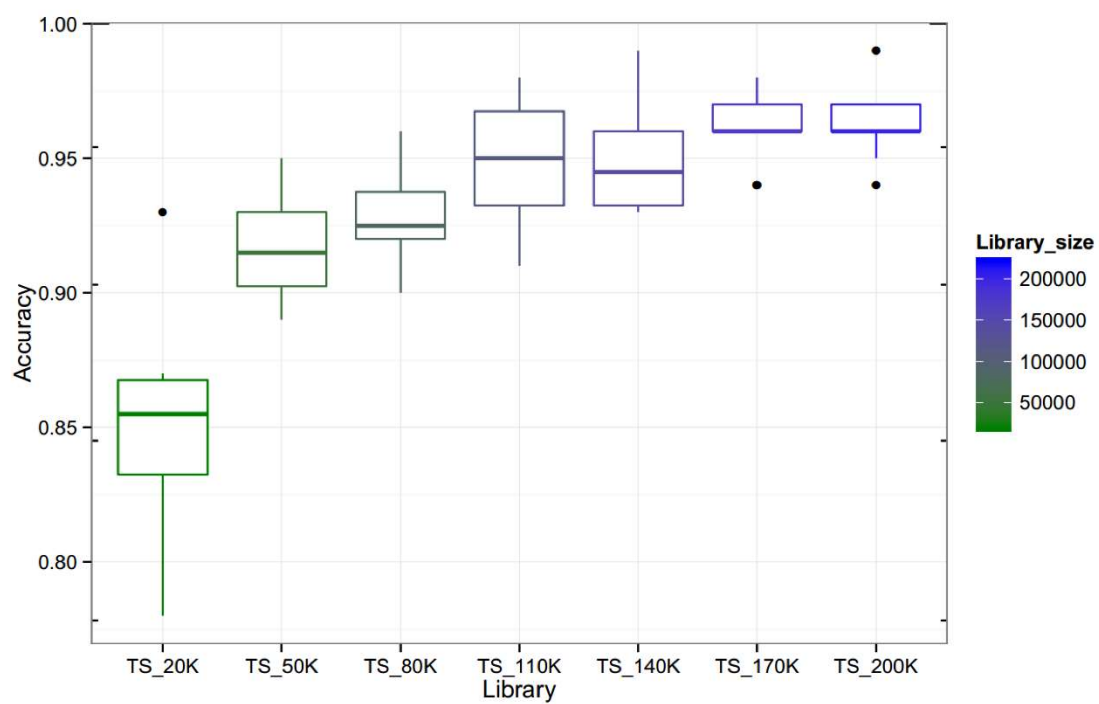

**Figure S6.** The training accuracy of insertion subsets with different saturation.
